# Supplementary material for: TGFβ pathway limits dedifferentiation following WNT and MAPK pathway activation to suppress intestinal tumourigenesis
Source: PubMed Central journal article supplement (PMC5596428; doi:10.1038/cdd.2017.92), 2017-06-16

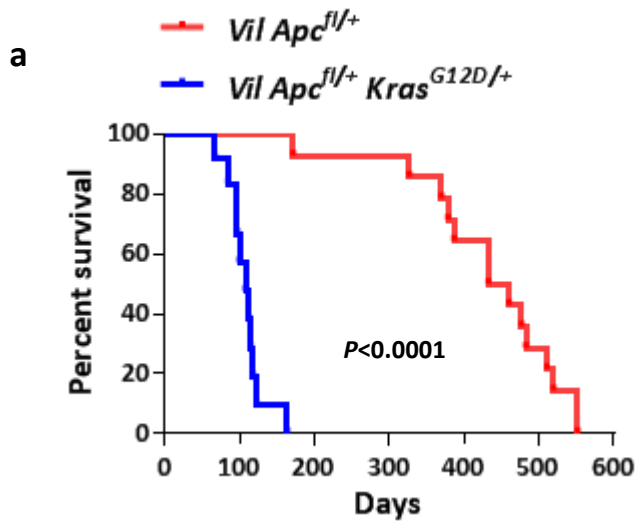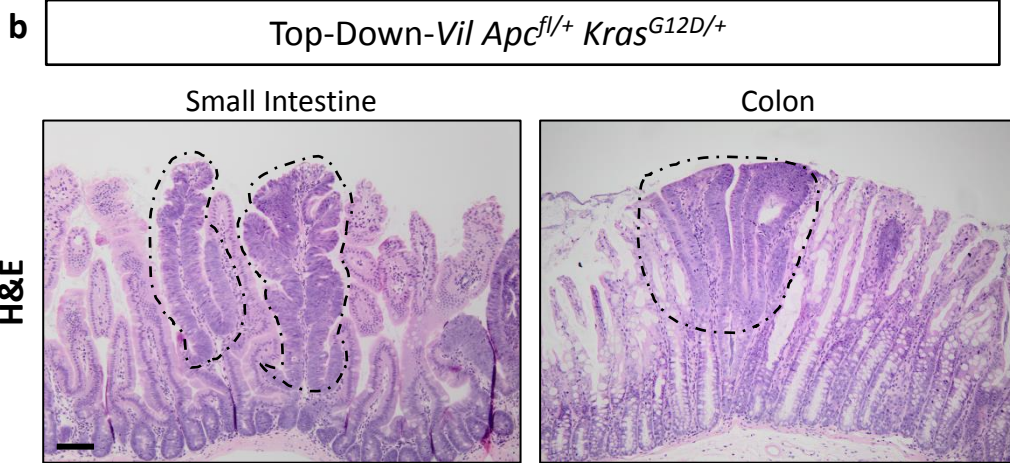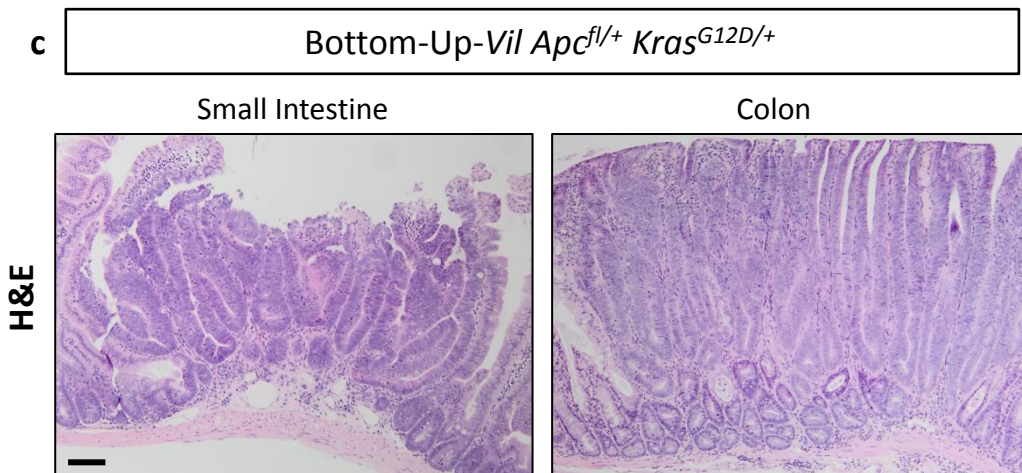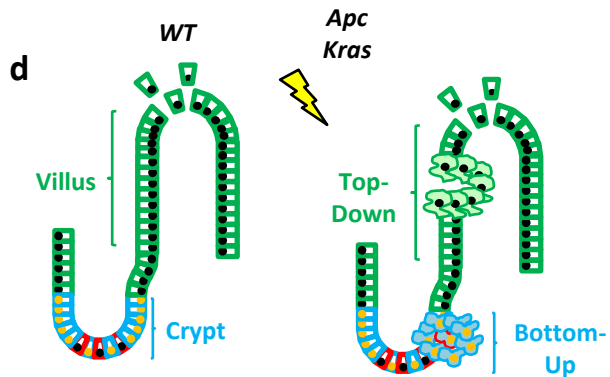

e

Top-Down-Vil *Apc<sup>fl/+</sup> Kras<sup>G12D/+</sup>*

Small Intestine

Colon

pSMAD3

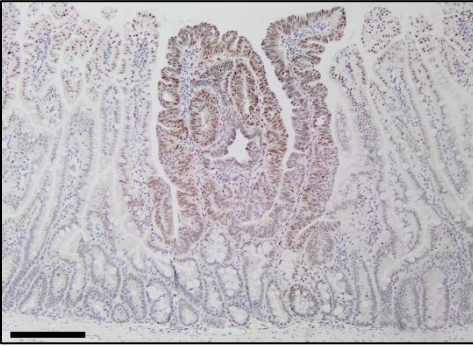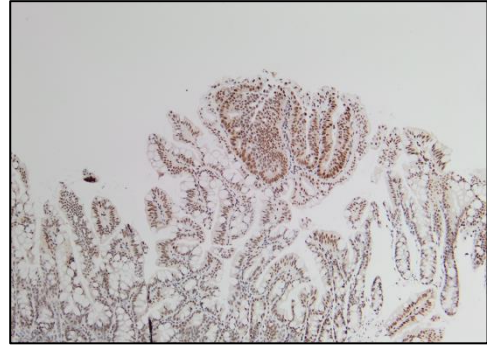

p21

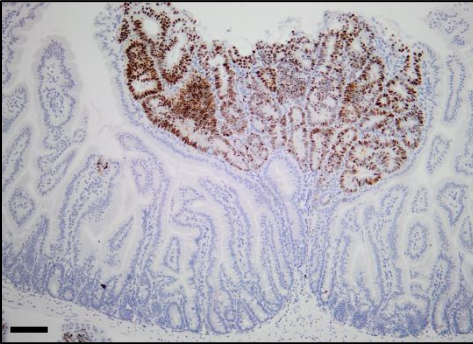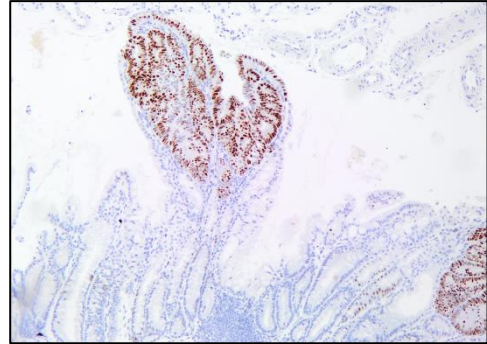

Bottom-Up-Vil *Apc<sup>fl/+</sup> Kras<sup>G12D/+</sup>*

pSMAD3

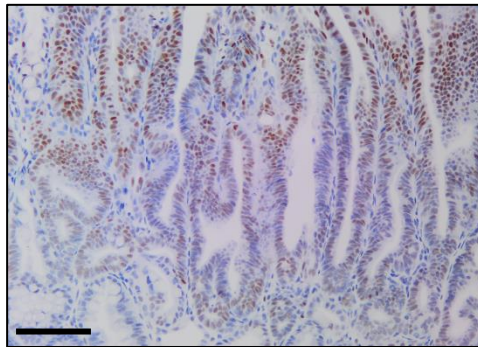

Supplement: cdd201792x3.pdf [file cdd201792x3.pdf]
