# Supplementary material for: TGFβ pathway limits dedifferentiation following WNT and MAPK pathway activation to suppress intestinal tumourigenesis
Source: PubMed Central journal article supplement (PMC5596428; doi:10.1038/cdd.2017.92), 2017-06-16

*VDS-Vil Apc<sup>fl/fl</sup> Kras<sup>G12D/+</sup> Tgfbr1<sup>fl/fl</sup>*

H&E

Lgr5

CD44v6

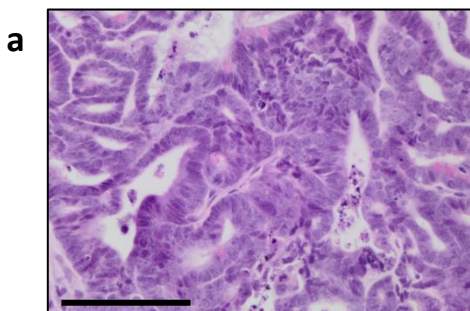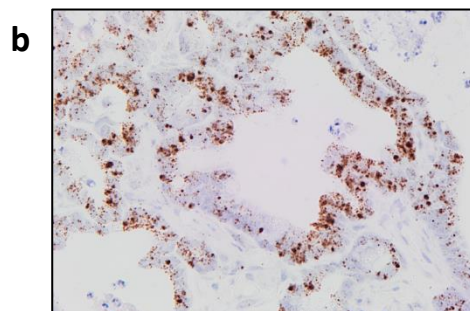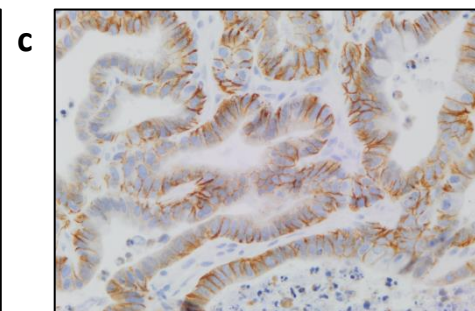

Supplement: cdd201792x6.pdf [file cdd201792x6.pdf]
