# Supplementary material for: TGFβ pathway limits dedifferentiation following WNT and MAPK pathway activation to suppress intestinal tumourigenesis
Source: PubMed Central journal article supplement (PMC5596428; doi:10.1038/cdd.2017.92), 2017-06-16

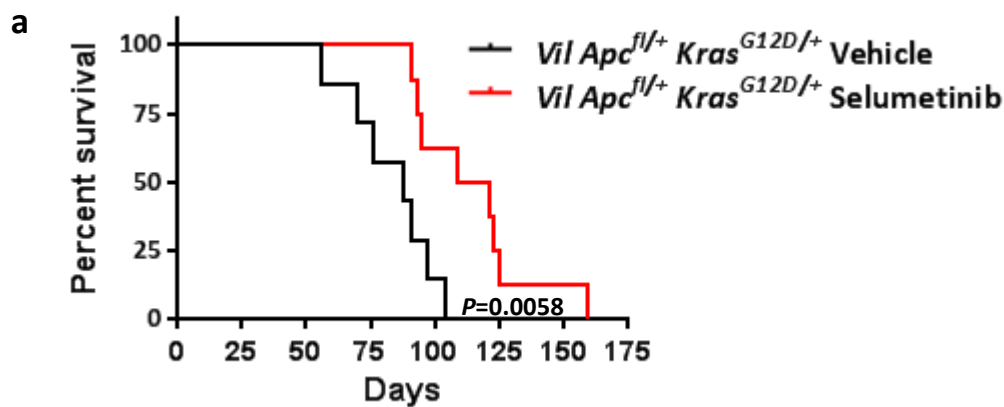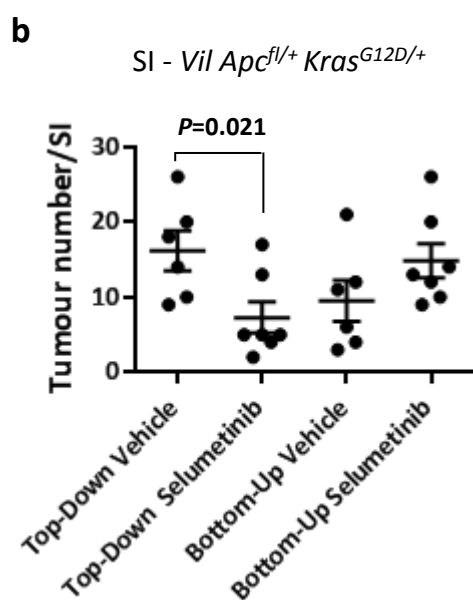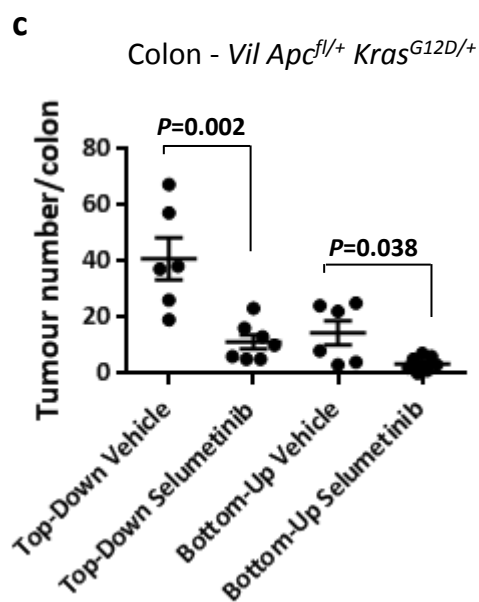

Supplement: cdd201792x7.pdf [file cdd201792x7.pdf]
